# Supplementary material
Source: PubMed Central journal article supplement (PMC2866004)

**Supplemental table 1**

|           | <b>Time (days)</b> | <b>ASC</b> | <b>MSC</b> | <b>Fibro</b> | <b>PBS</b> |
|-----------|--------------------|------------|------------|--------------|------------|
| LVFS (%)  | 14                 | 38.2 ± 3.5 | 35.2 ± 3.2 | 38.6 ± 3.2   | 33.2 ± 2.0 |
| LVFS (%)  | 28                 | 35.9 ± 1.7 | 32.5 ± 2.4 | 35.2 ± 2.8   | 34.2 ± 3.4 |
| LVFS (%)  | 42                 | 33.1 ± 1.0 | 33.0 ± 3.5 | 31.3 ± 2.2   | 32.0 ± 1.8 |
| LVdd (mm) | 14                 | 3.9 ± 0.3  | 3.7 ± 0.2  | 3.4 ± 0.2    | 3.5 ± 0.6  |
| LVdd (mm) | 28                 | 4.0 ± 0.3  | 4.0 ± 0.2  | 3.7 ± 0.1    | 3.4 ± 0.1  |
| LVdd (mm) | 42                 | 3.8 ± 0.1  | 4.0 ± 0.2  | 3.9 ± 0.1    | 3.5 ± 0.1  |
| LVsd (mm) | 14                 | 2.4 ± 0.1  | 2.4 ± 0.2  | 2.1 ± 0.2    | 2.3 ± 0.1  |
| LVsd (mm) | 28                 | 2.6 ± 0.2  | 2.8 ± 0.2  | 2.4 ± 0.1    | 2.4 ± 0.1  |
| LVsd (mm) | 42                 | 2.5 ± 0.1  | 2.7 ± 0.3  | 2.7 ± 0.1    | 2.4 ± 0.1  |

**Supplemental table 1:** *Non-invasive echocardiography measurements.* Values are reported in mean ± SEM.

No symbols indicate  $P=NS$  (Repeated measurements ANOVA).

Type of file: figure

Label: 1

Filename: tpa-2008-0663-File002.ppt

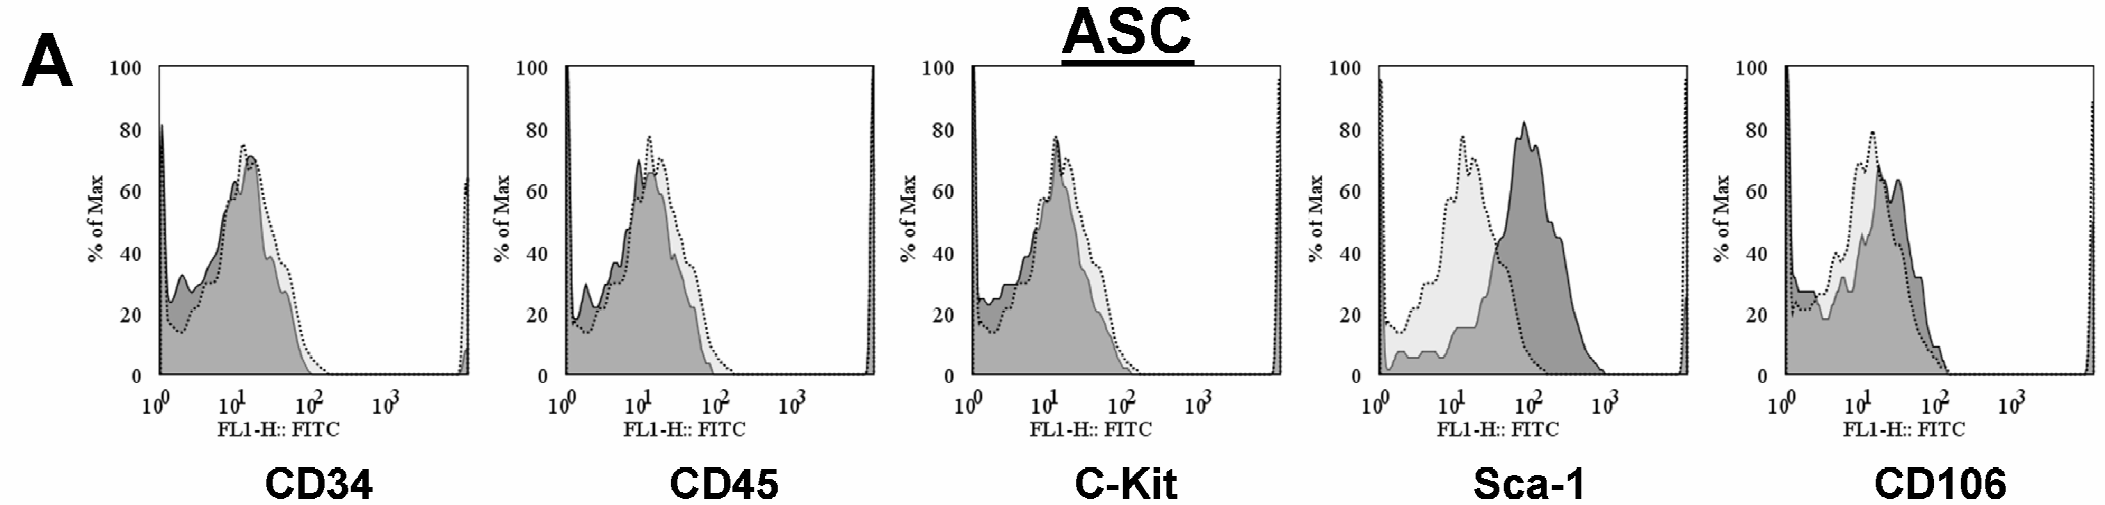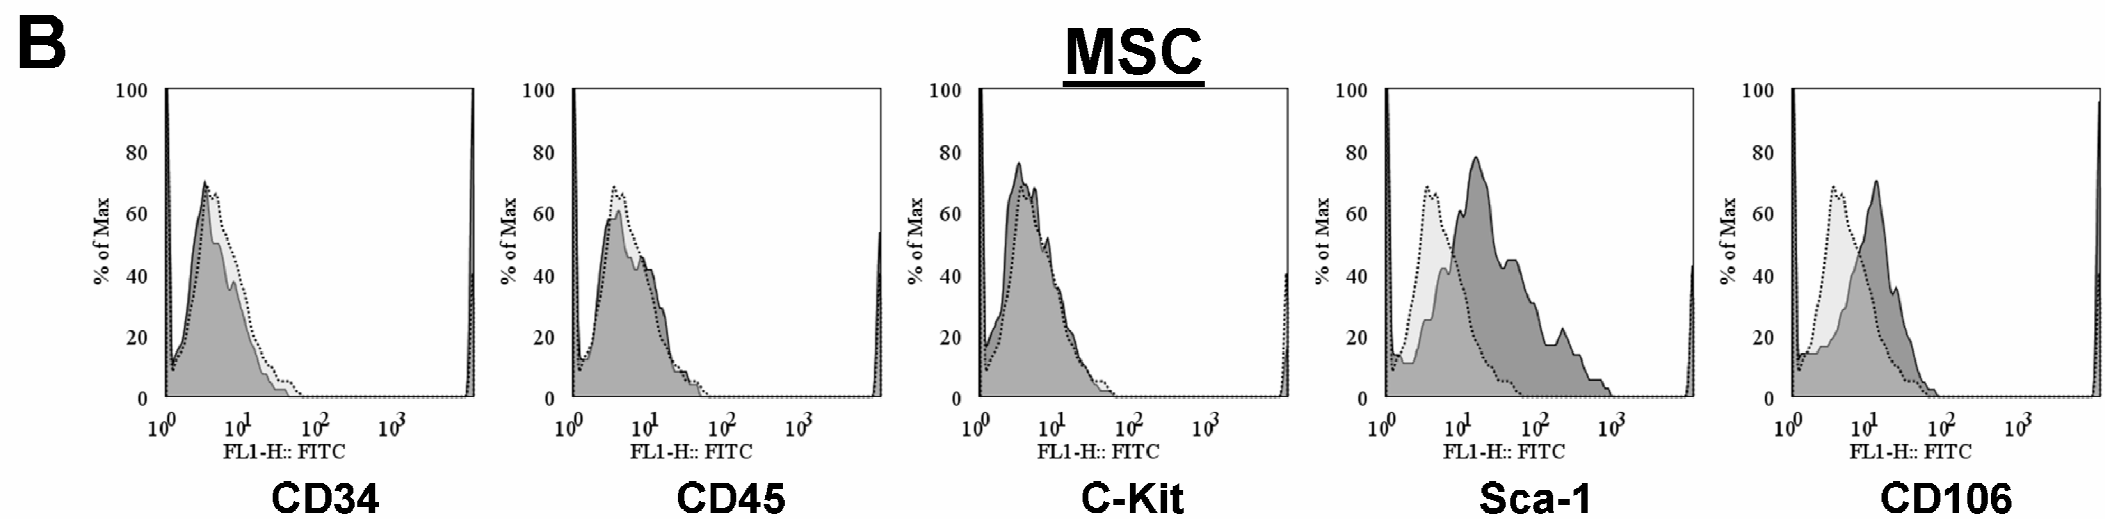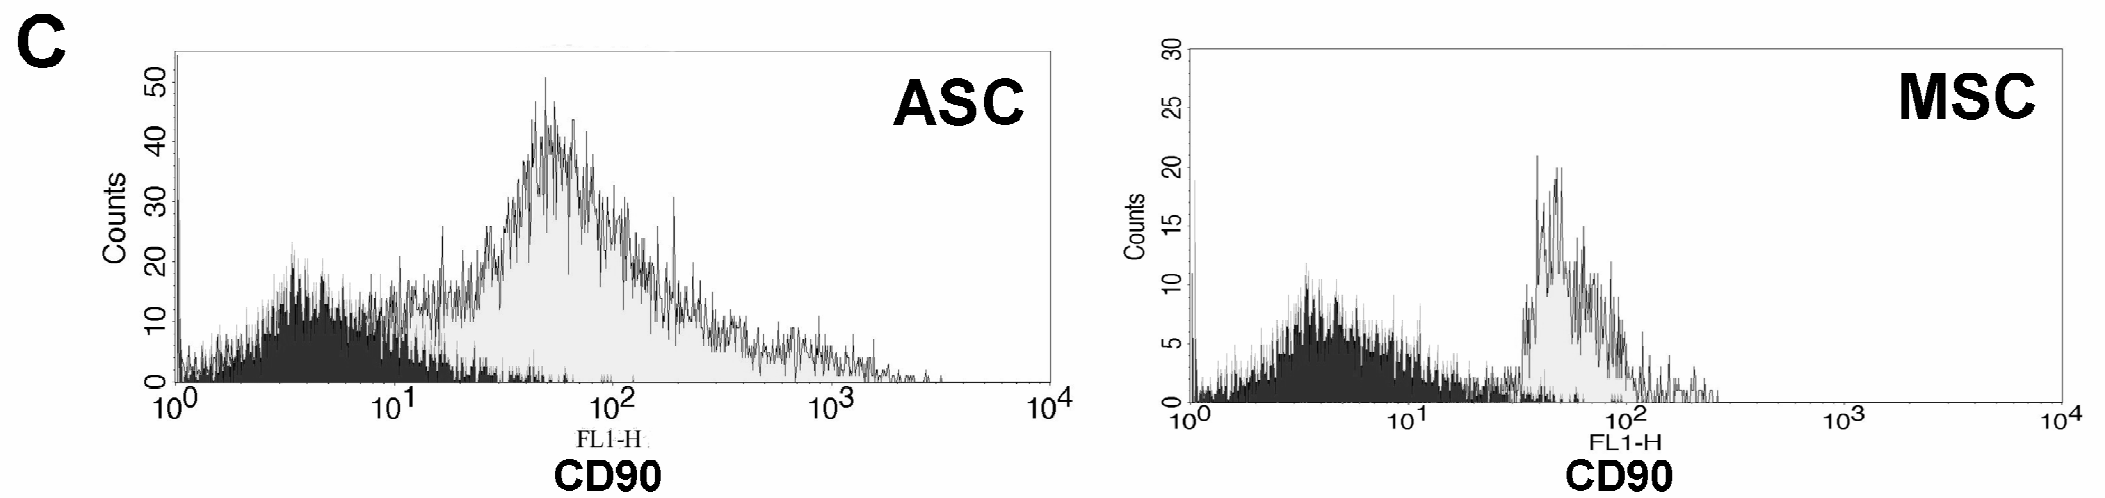

Type of file: figure

Label: 10

Filename: tpa-2008-0663-File012.ppt

**A**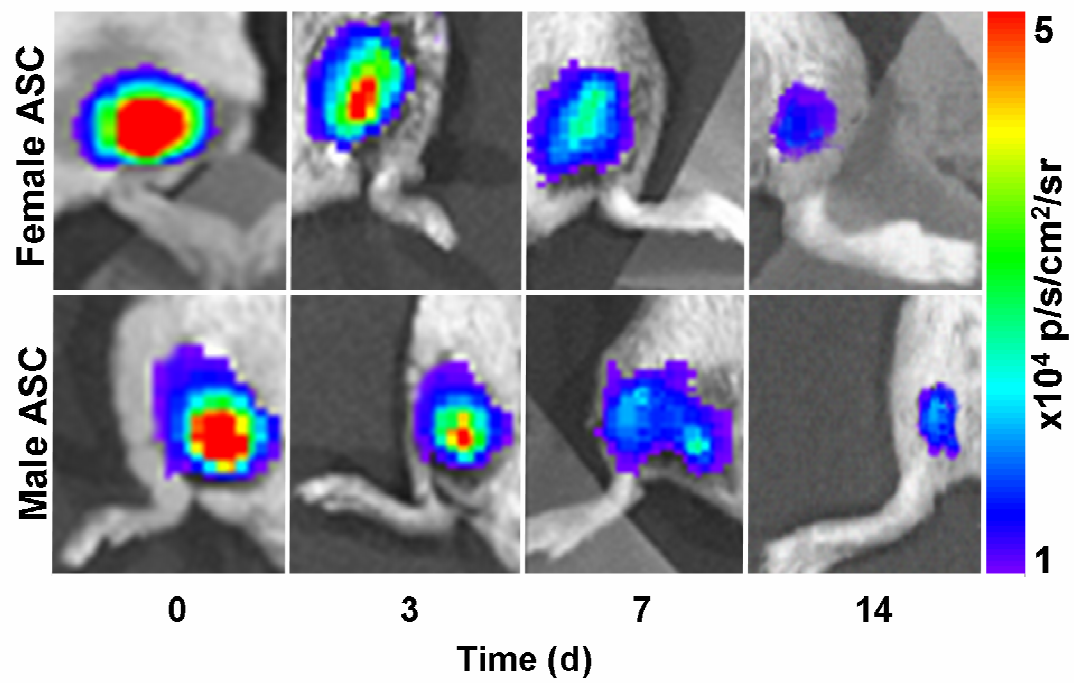**B**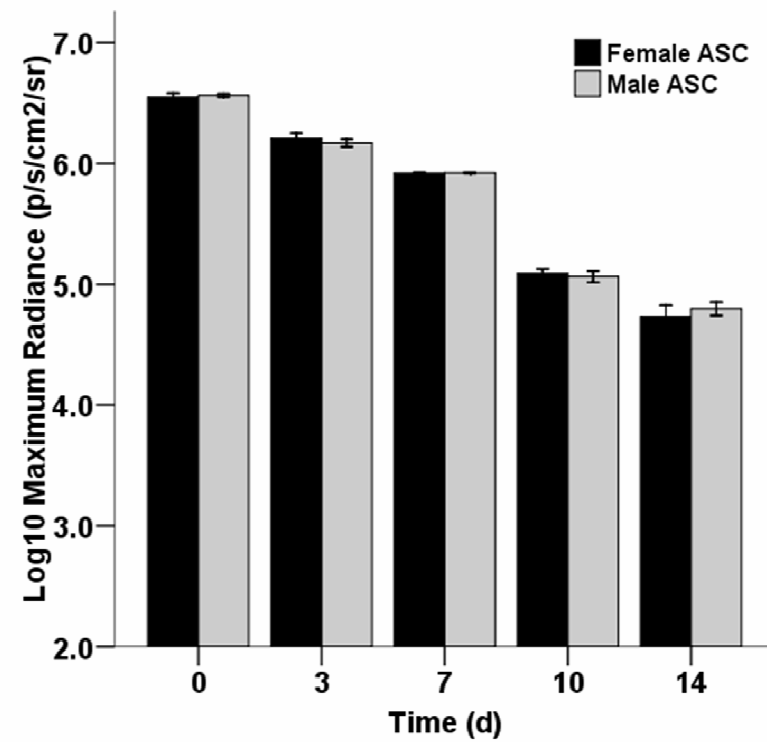

Type of file: figure

Label: 11

Filename: tpa-2008-0663-File013.ppt

**Infarction**

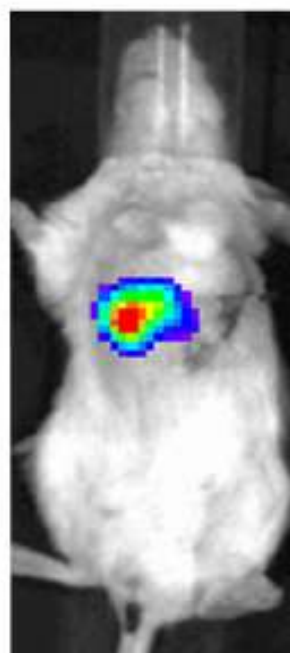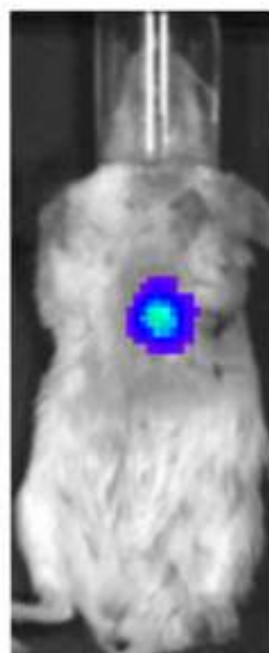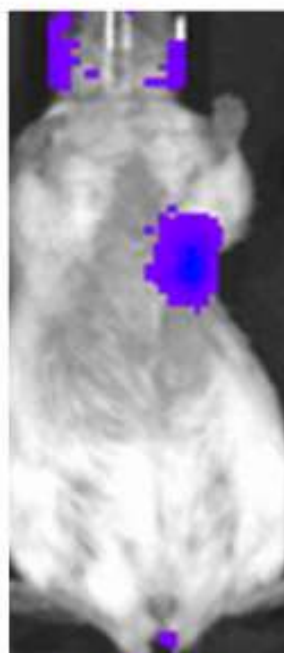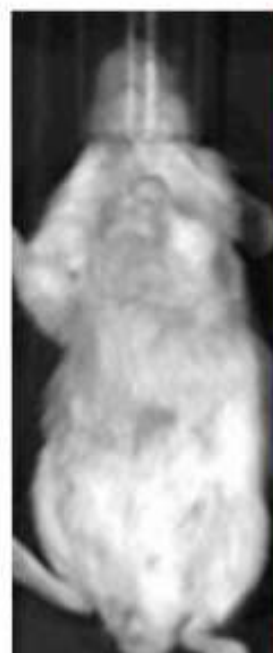

**No infarction**

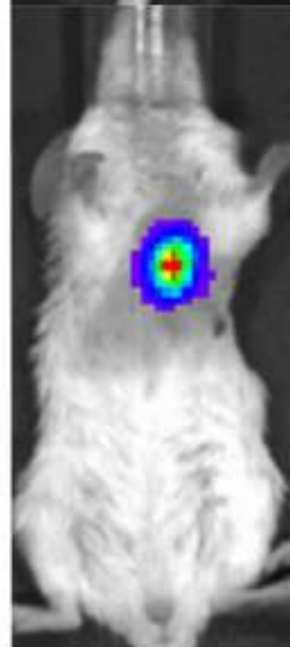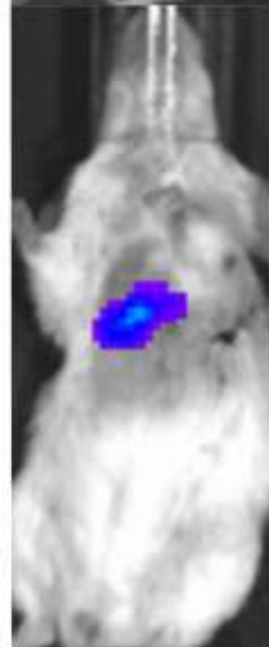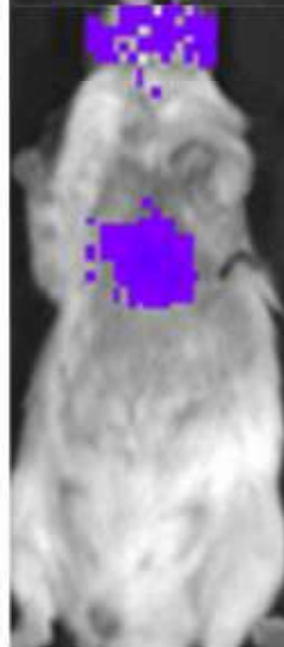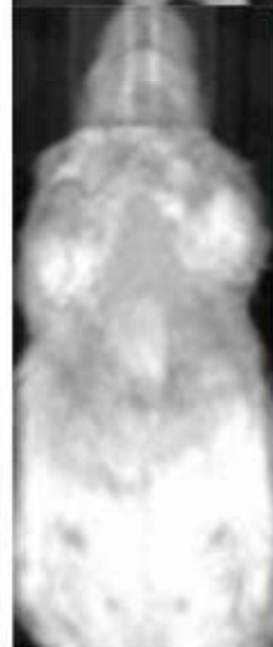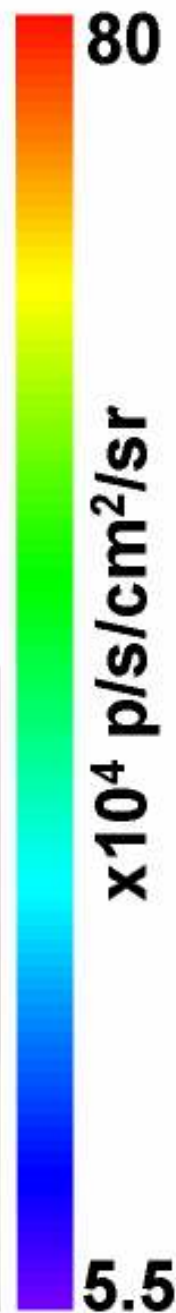

**2**

**7**

**14**

**21**

**Time (d)**

Type of file: figure

Label: 12

Filename: tpa-2008-0663-File014.ppt



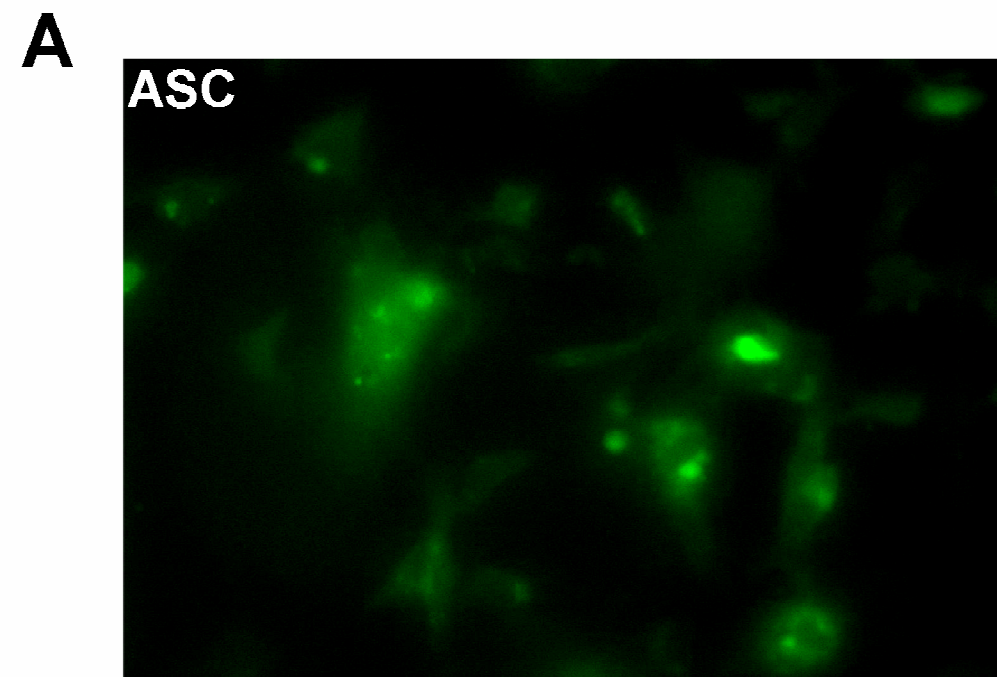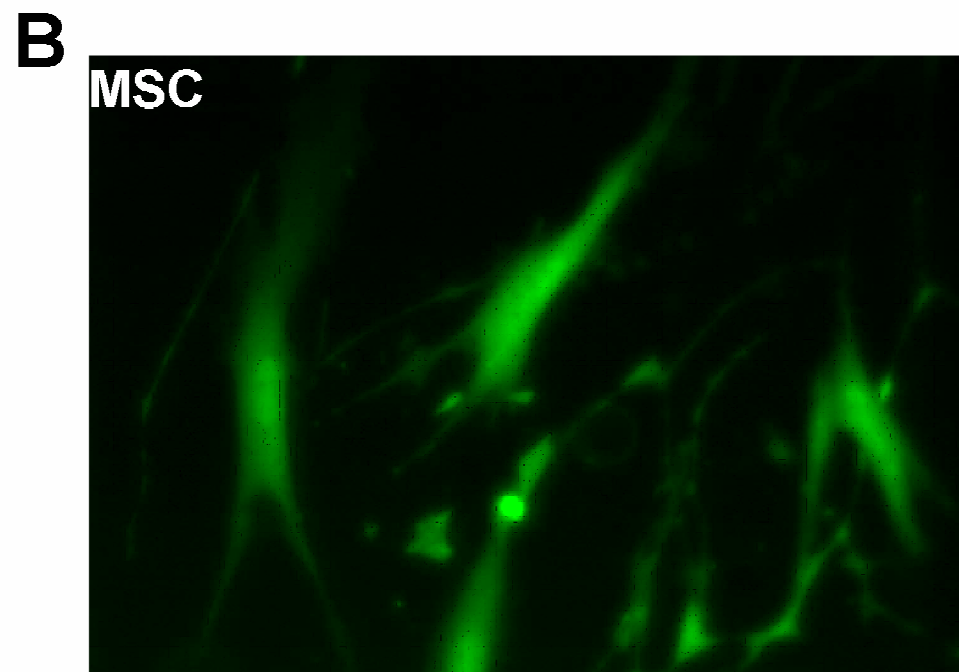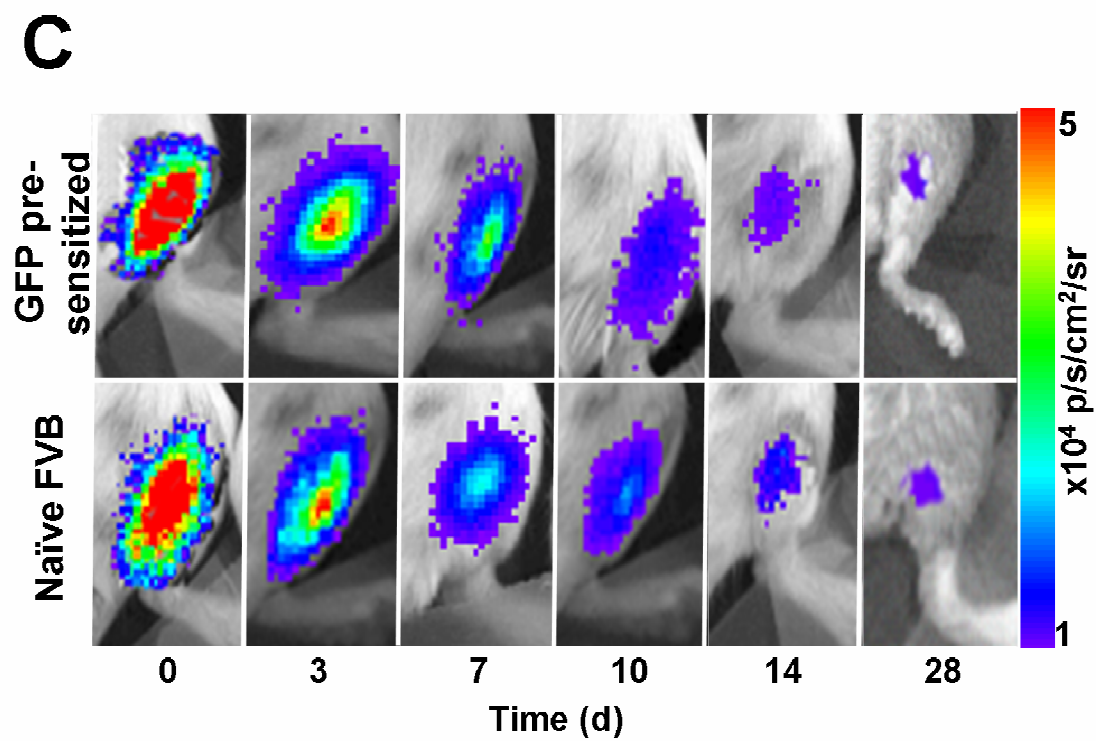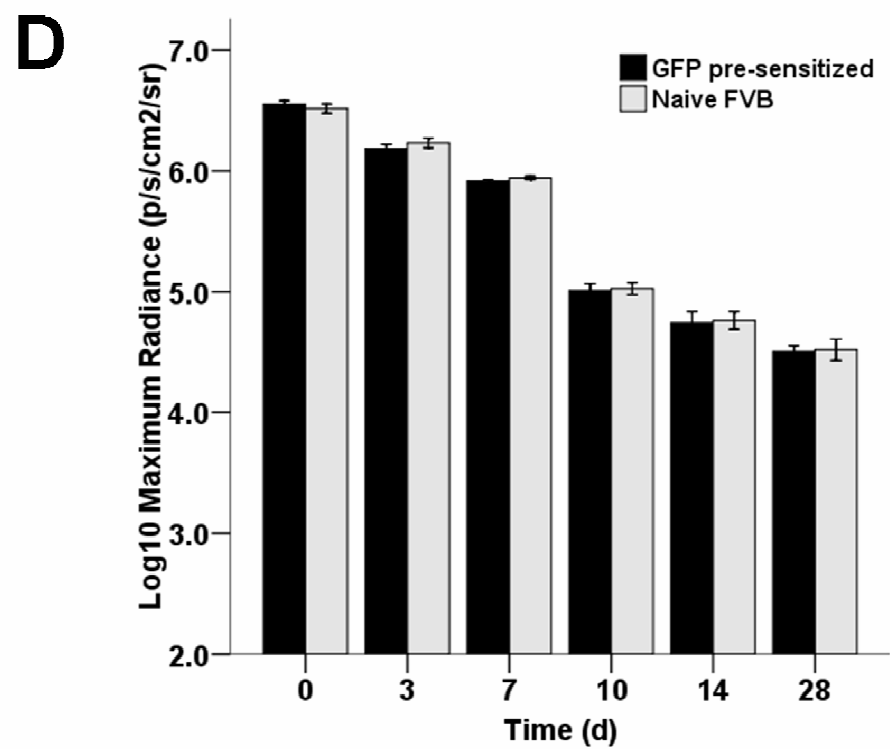

Type of file: figure

Label: 2

Filename: tpa-2008-0663-File003.ppt

**A**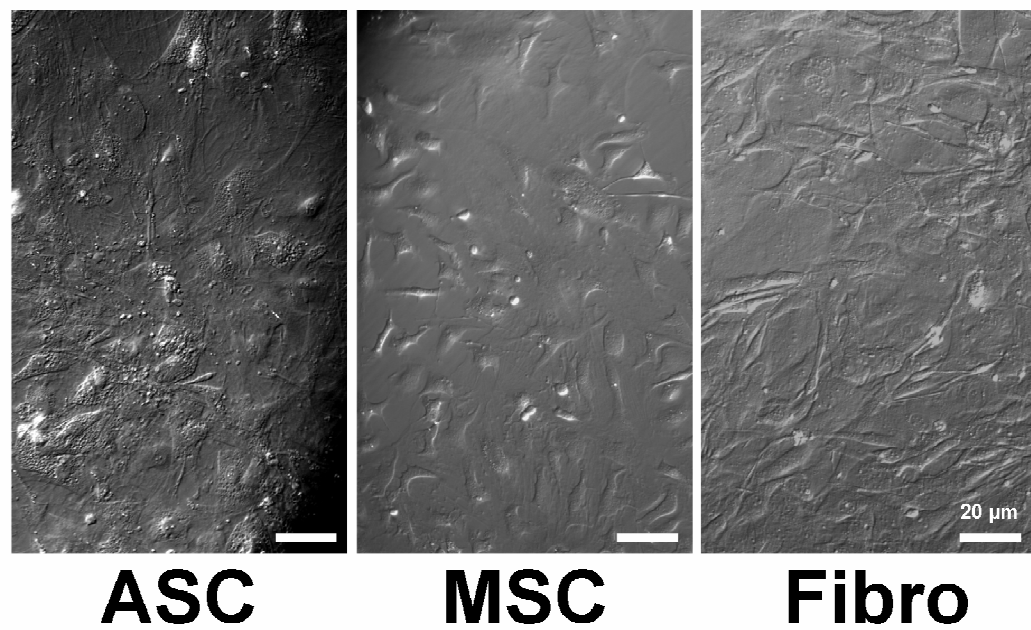**B**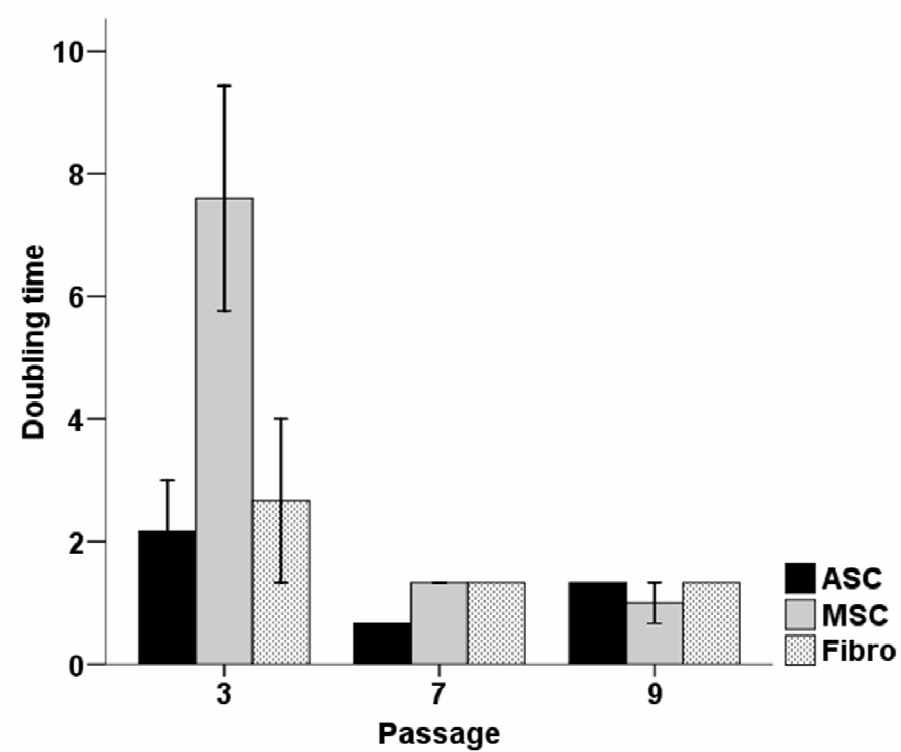**C**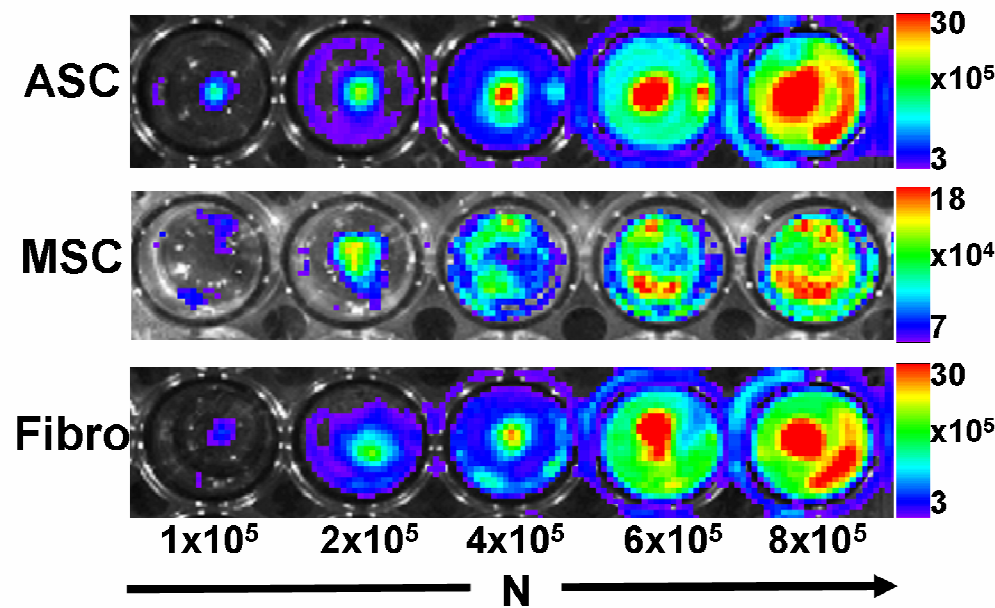**D**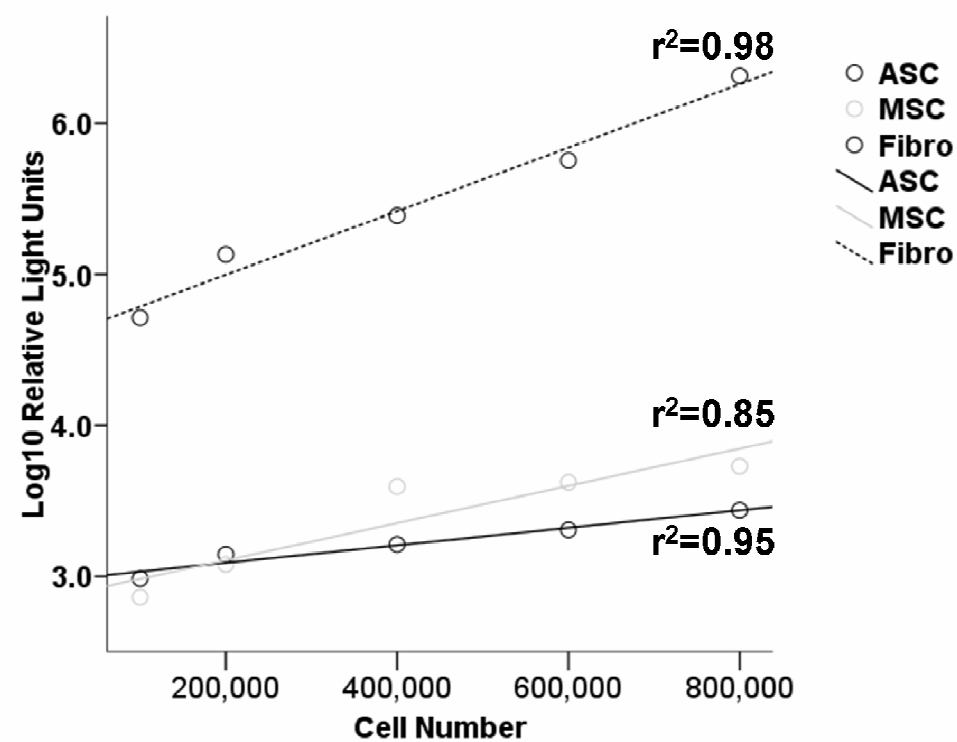

Type of file: figure

Label: 3

Filename: tpa-2008-0663-File004.ppt

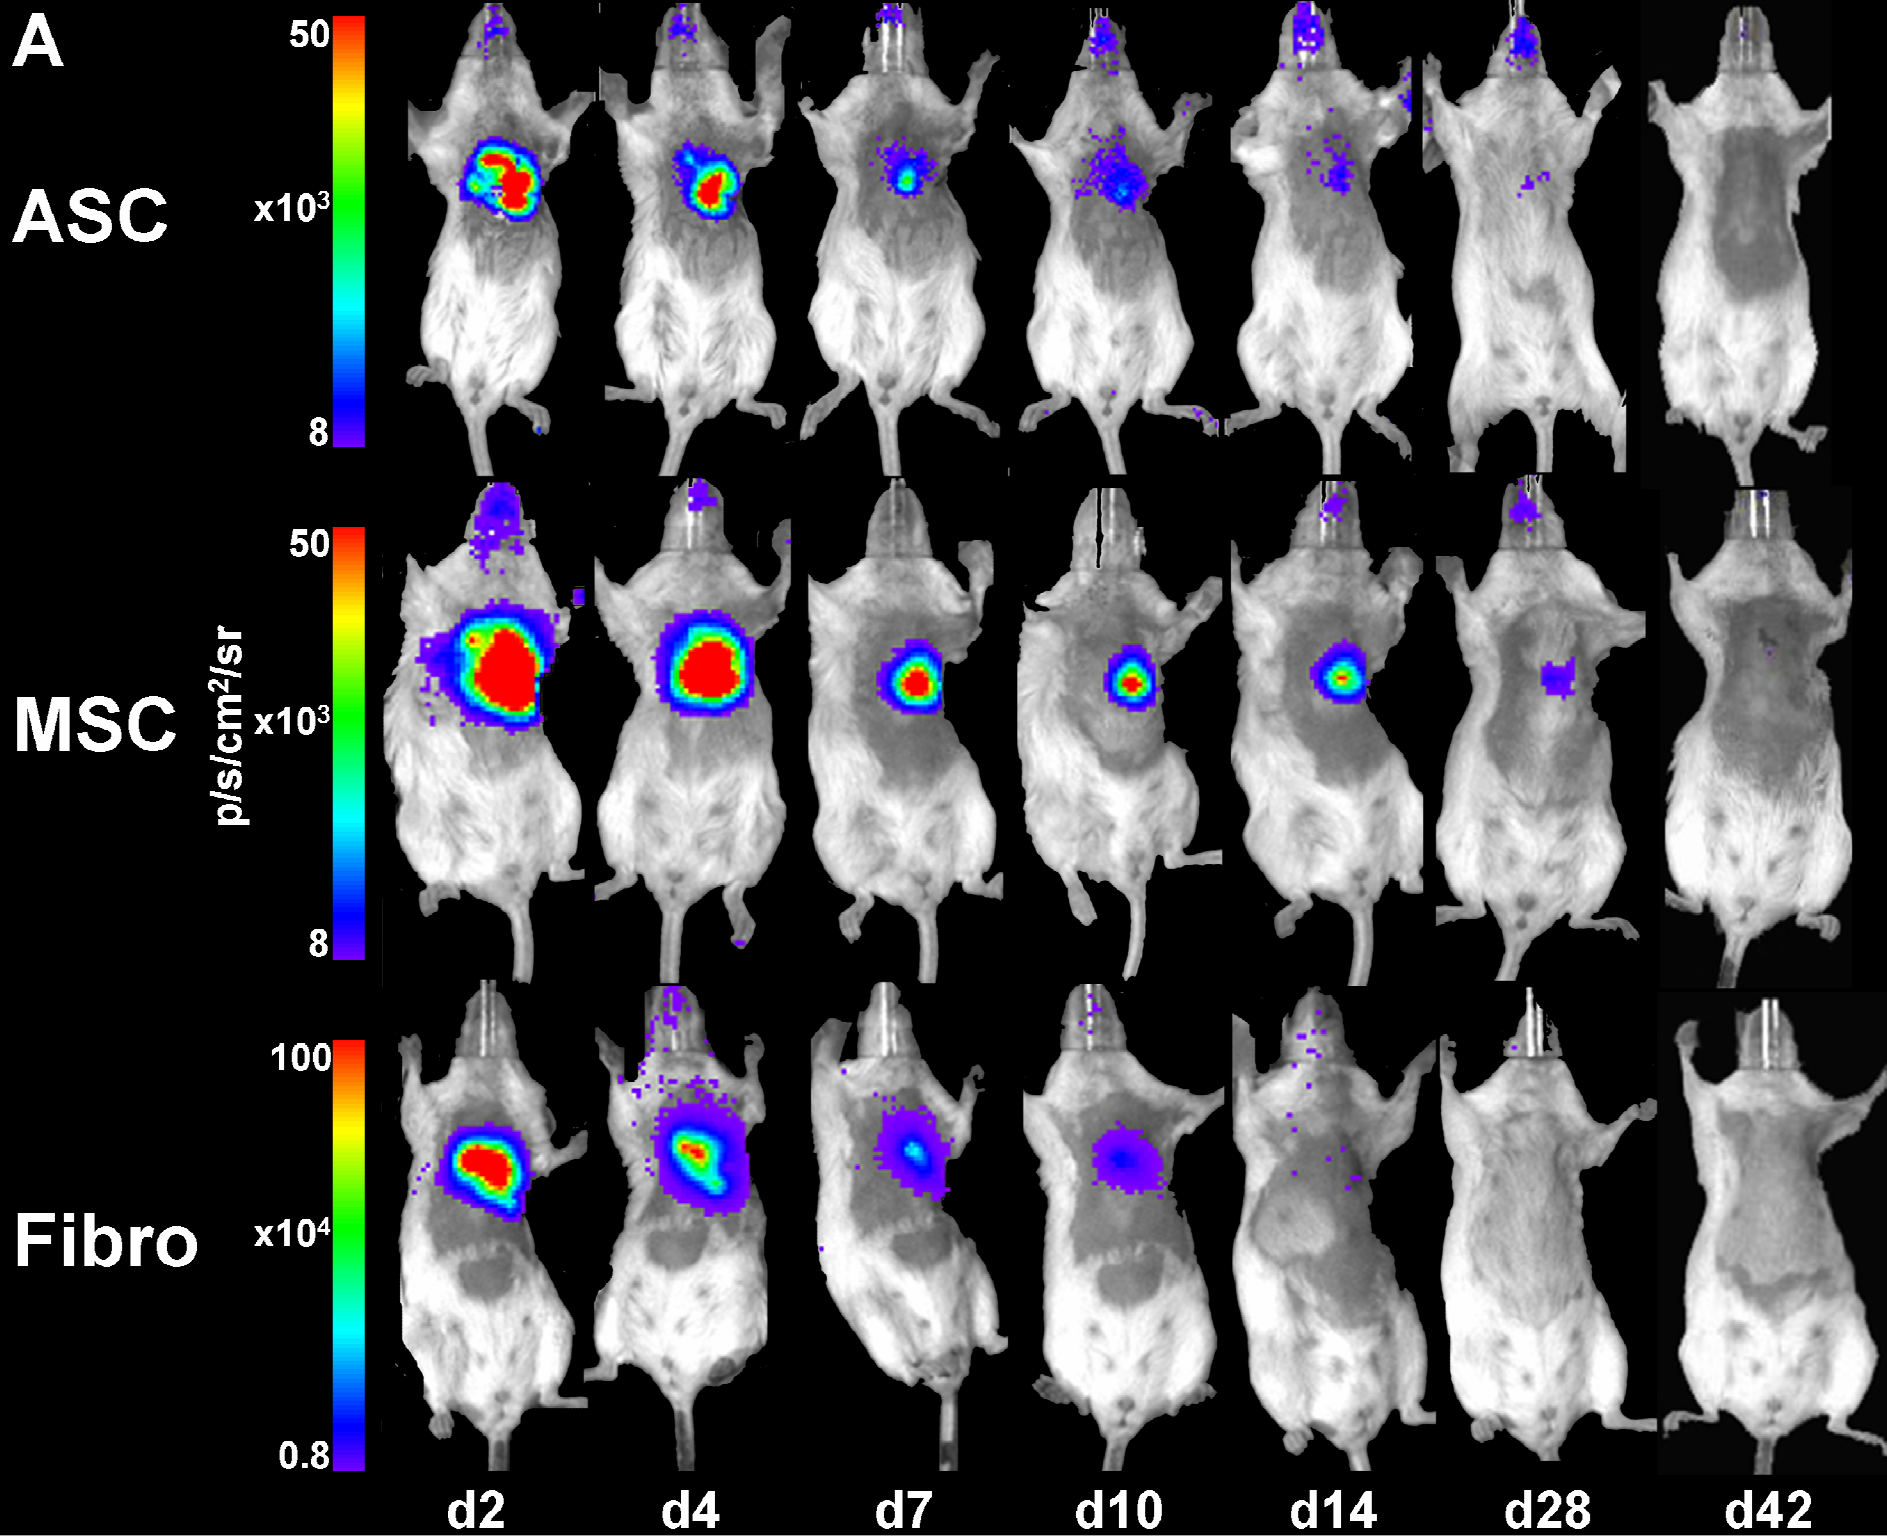

Type of file: figure

Label: 4

Filename: tpa-2008-0663-File005.ppt

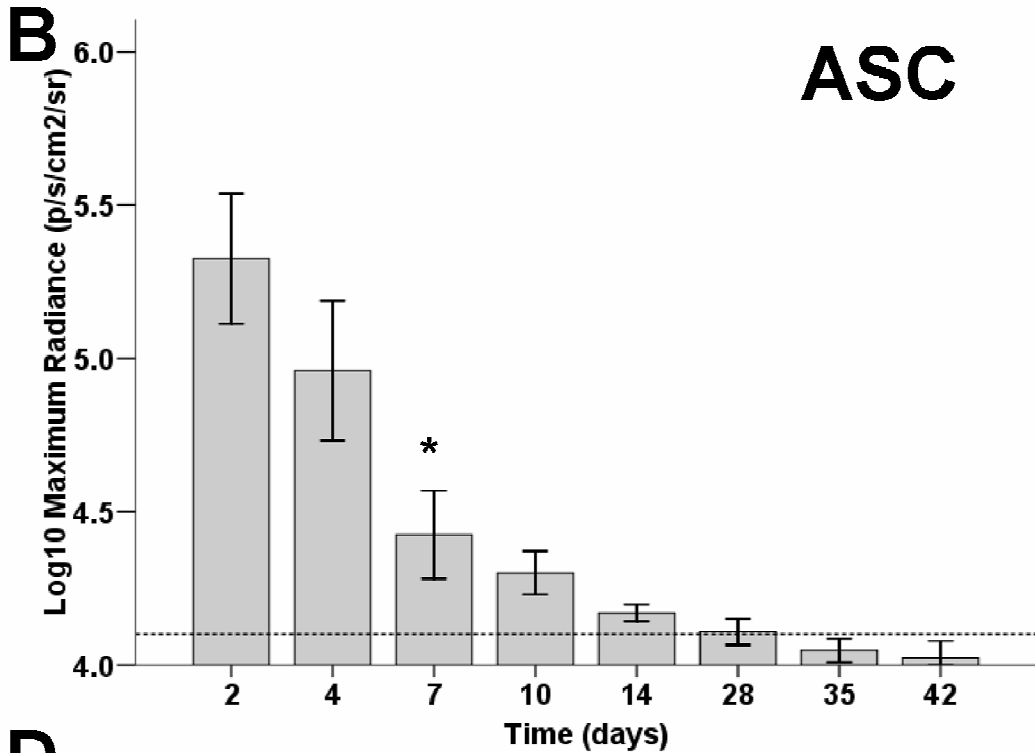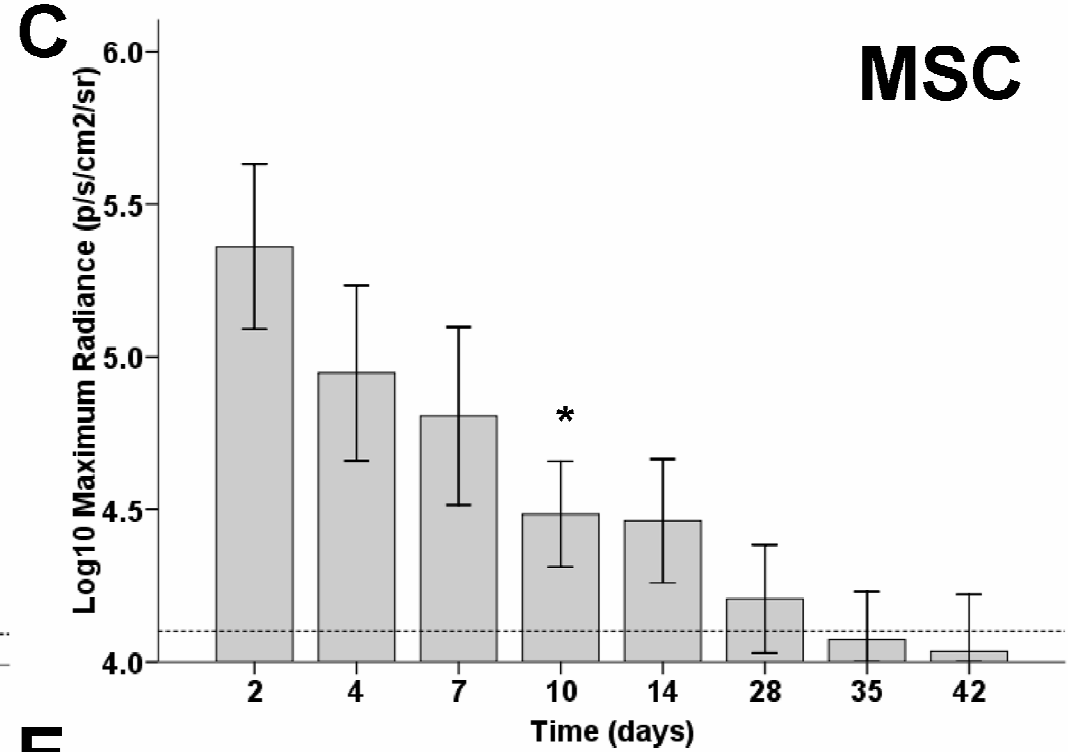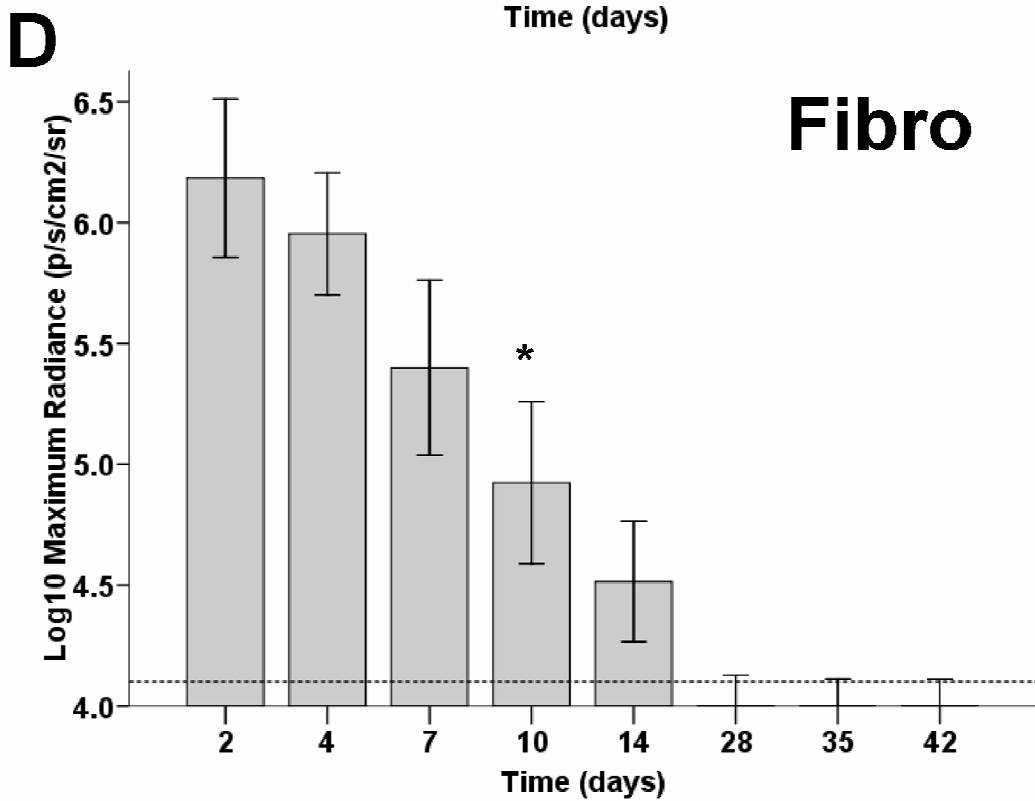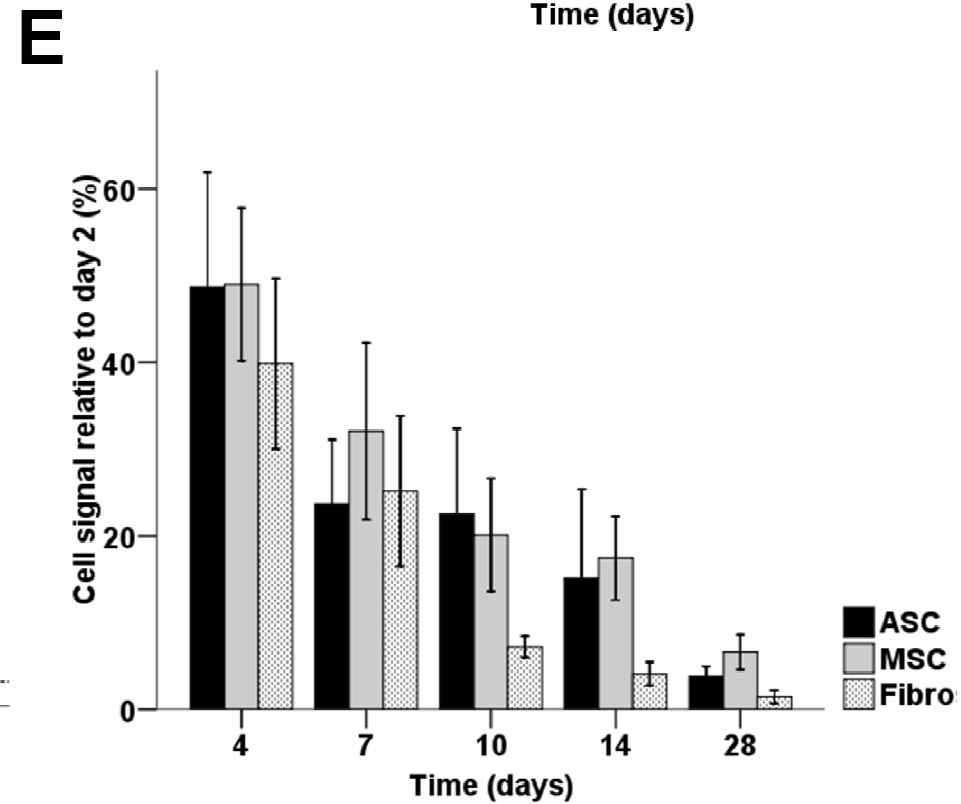

Type of file: figure

Label: 5

Filename: tpa-2008-0663-File006.ppt



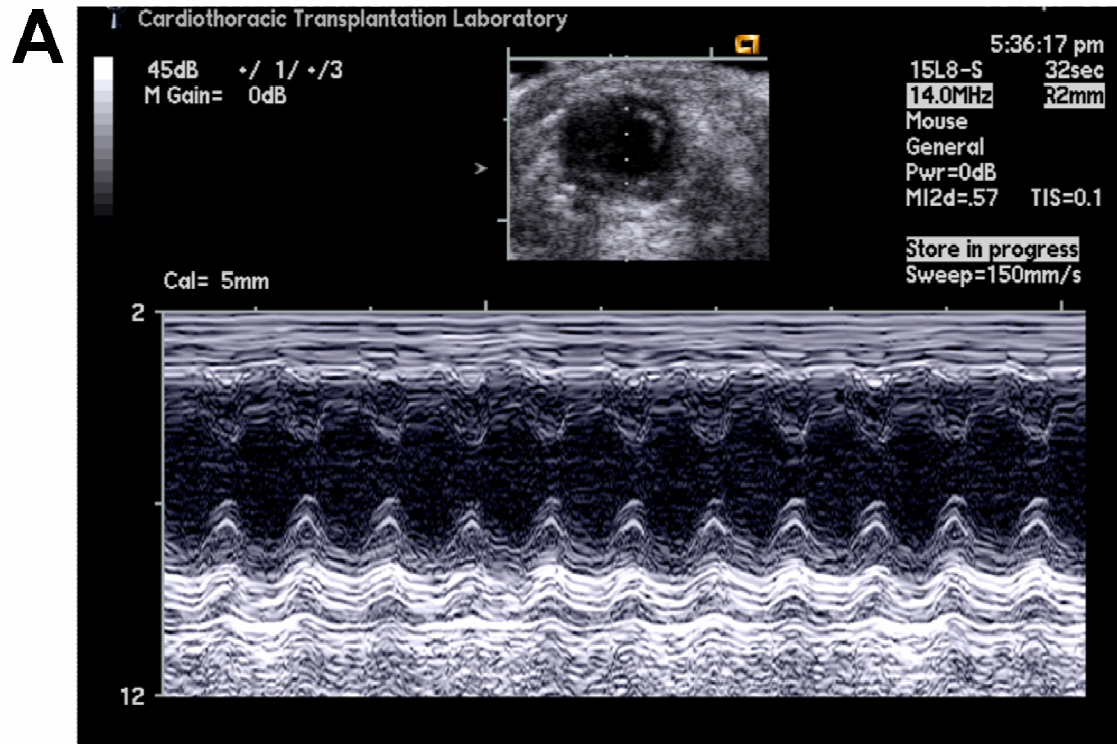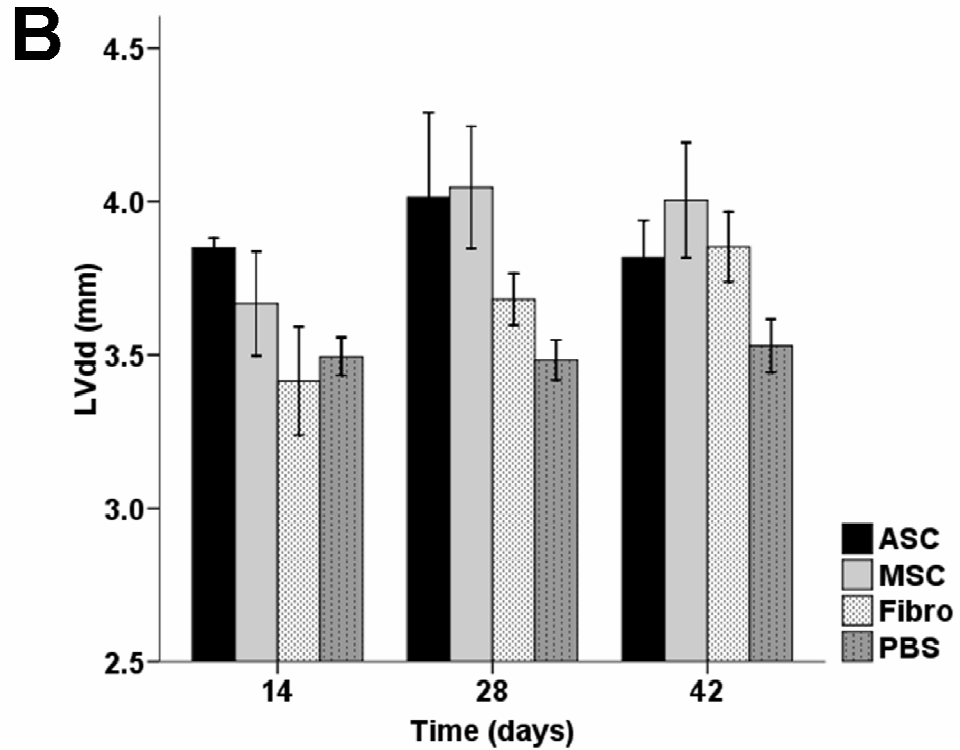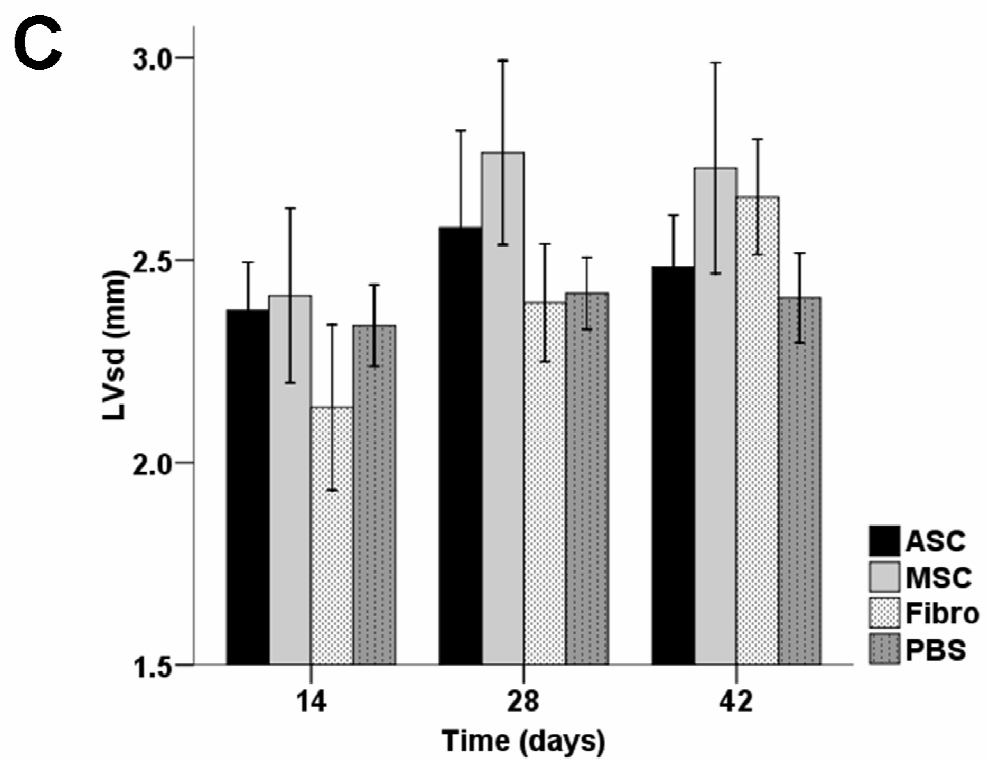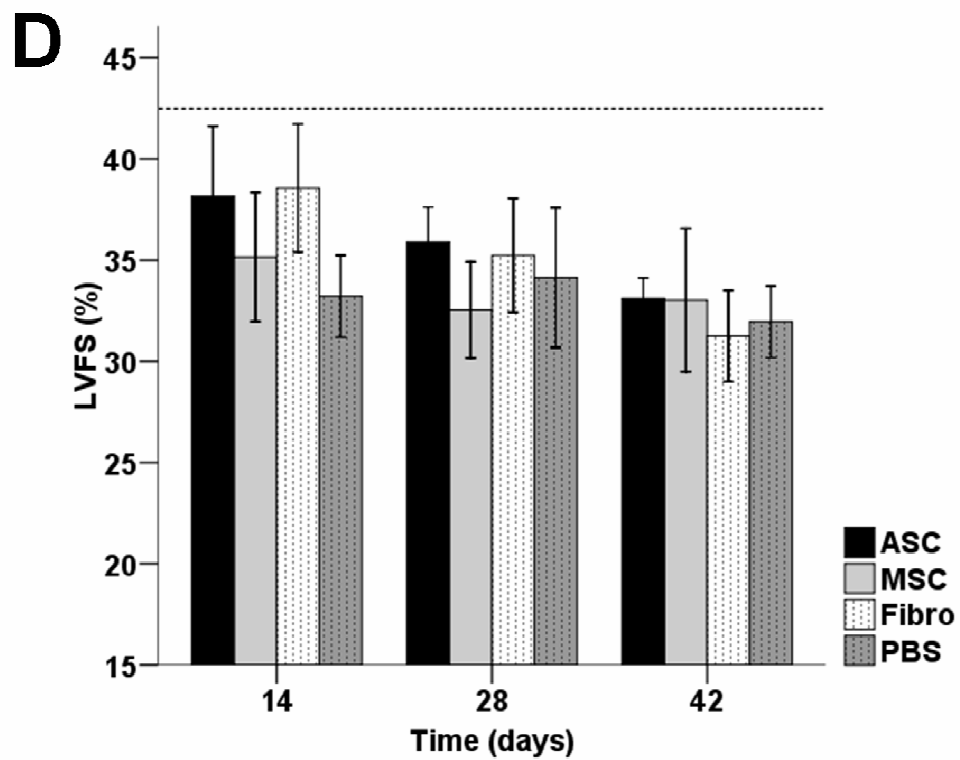

Type of file: figure

Label: 6

Filename: tpa-2008-0663-File007.ppt

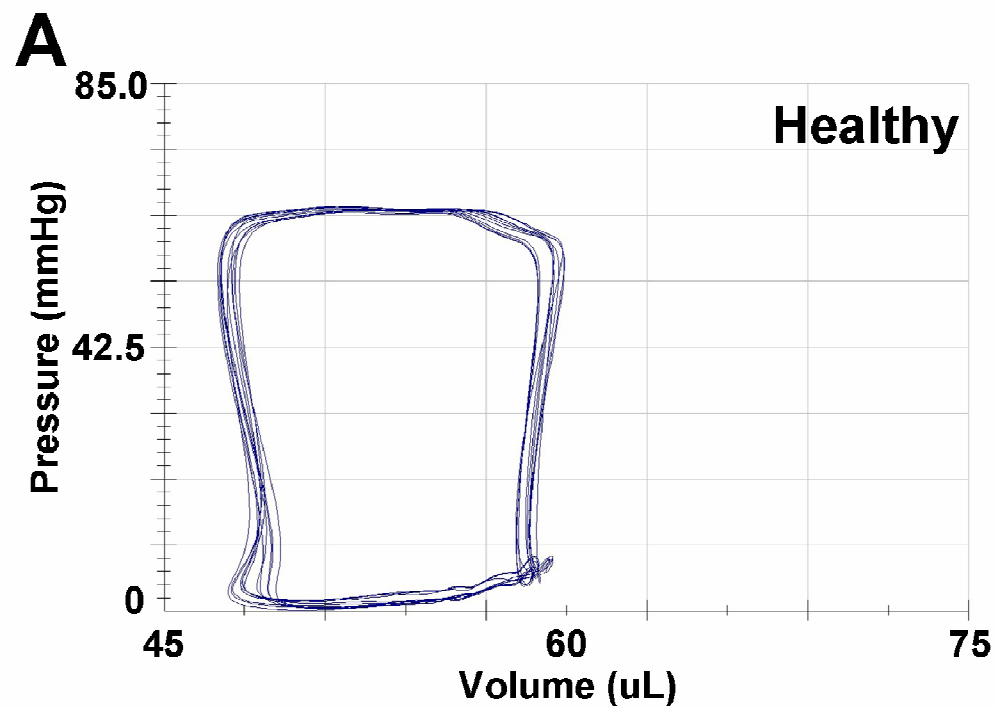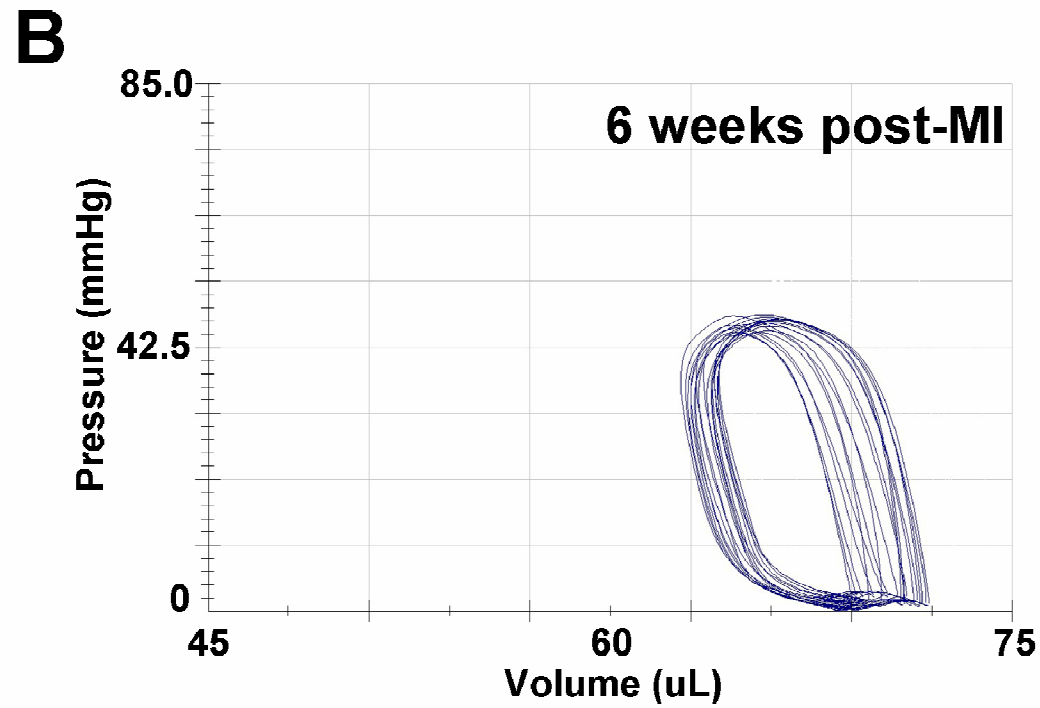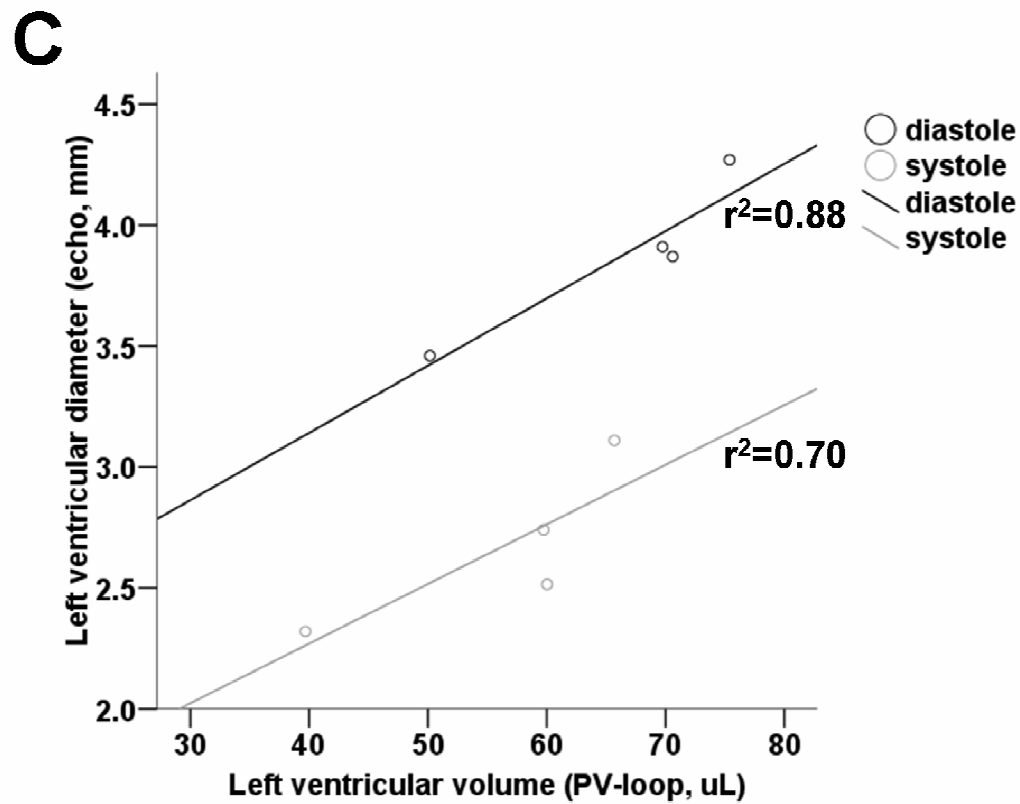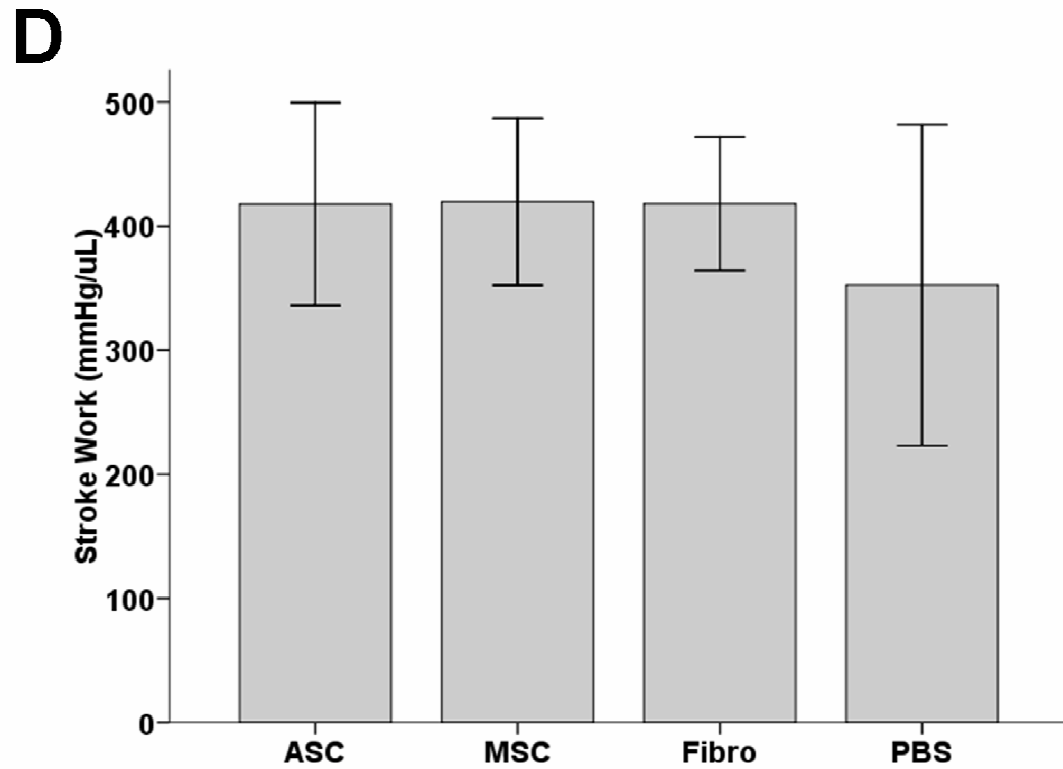

Type of file: figure

Label: 7

Filename: tpa-2008-0663-File008.ppt

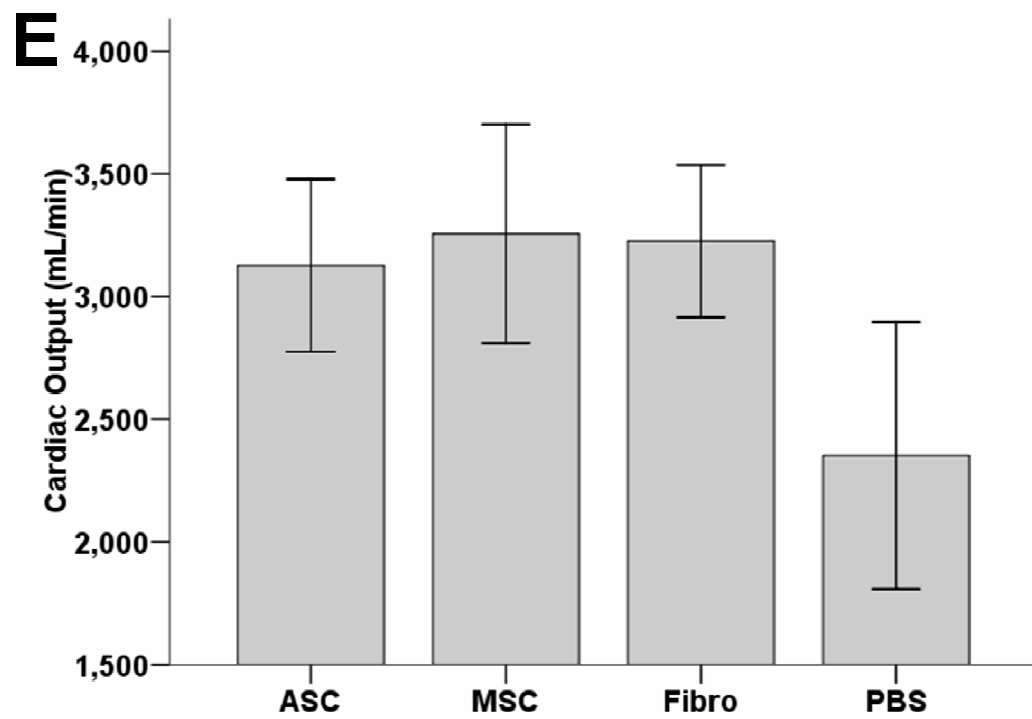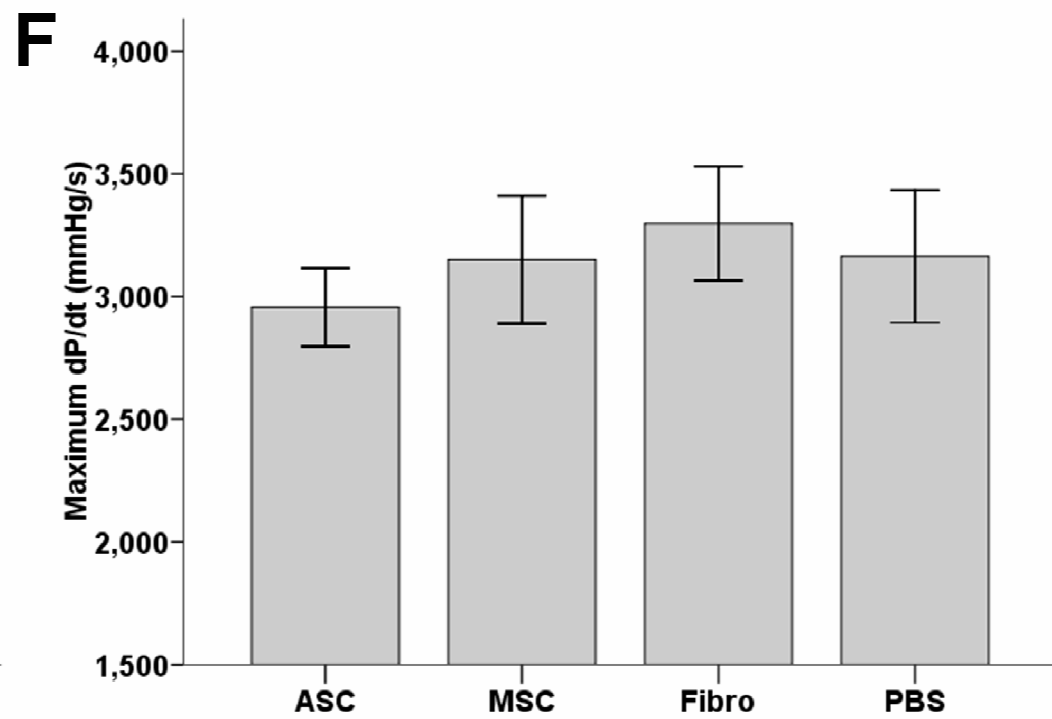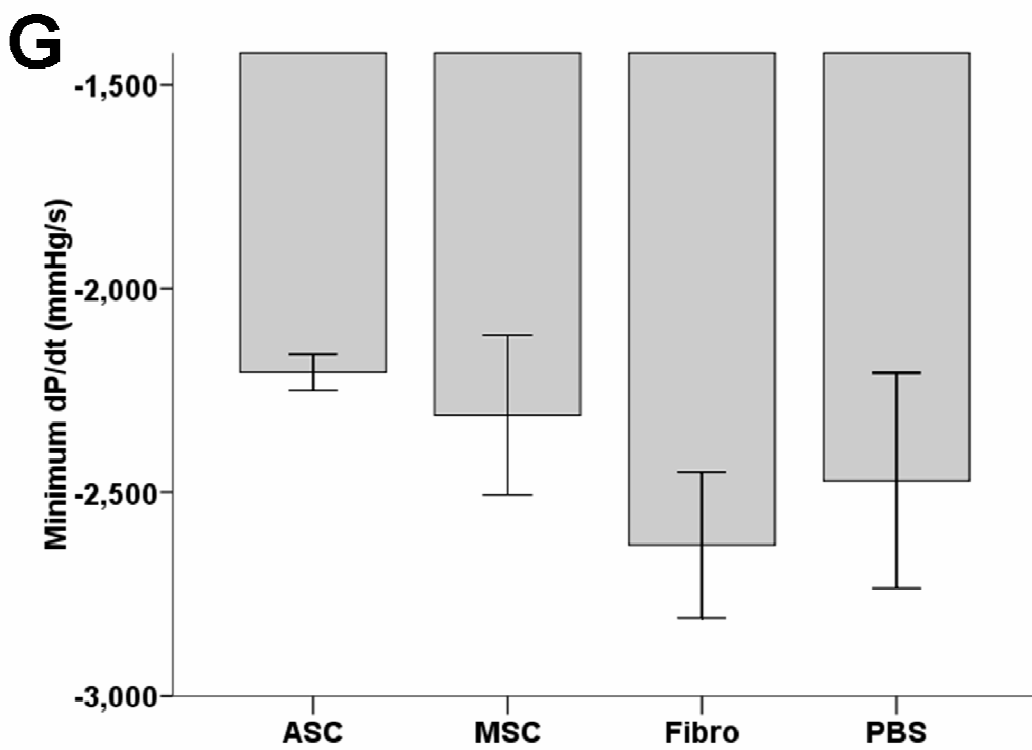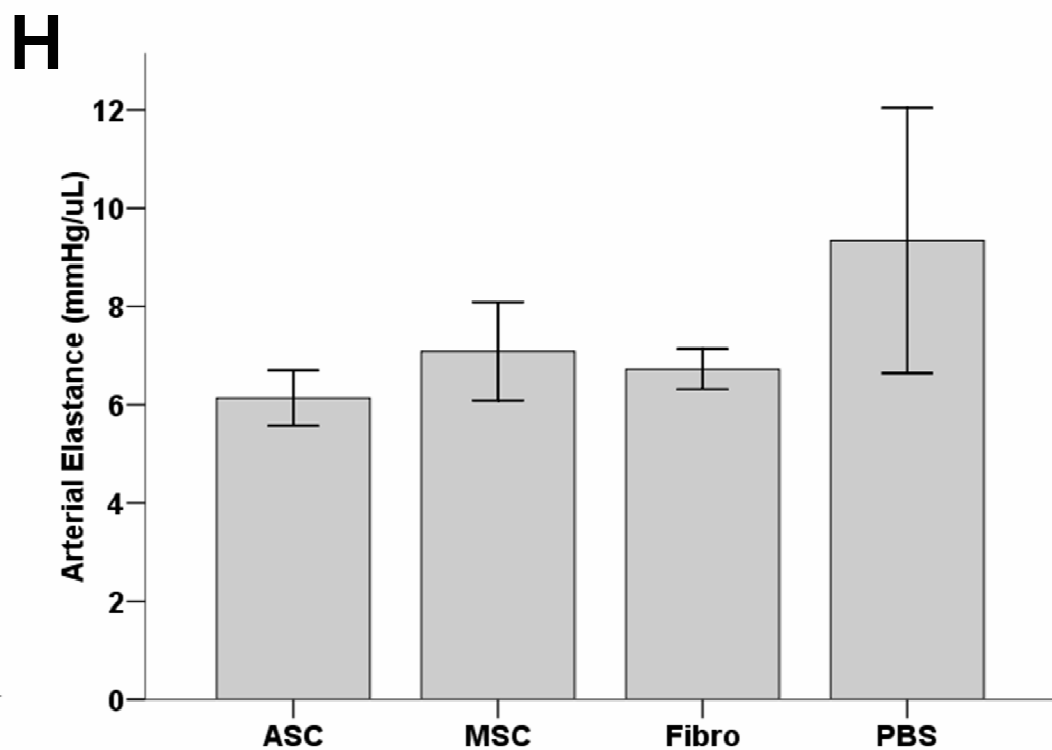

Type of file: figure

Label: 8

Filename: tpa-2008-0663-File009.ppt

**A** **ASC**

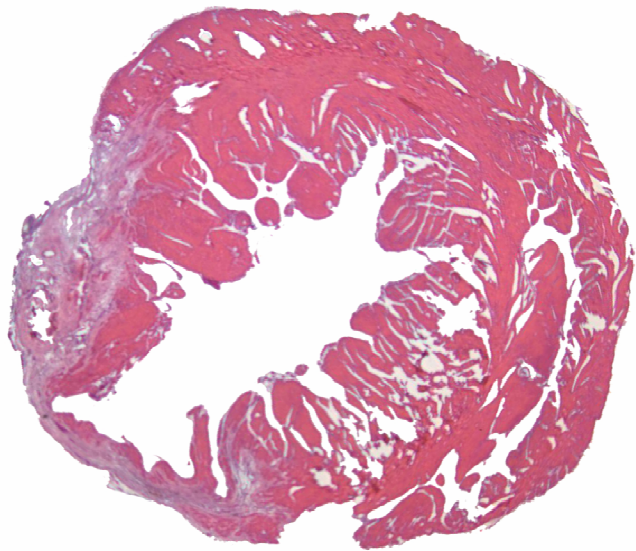

**B** **MSC**

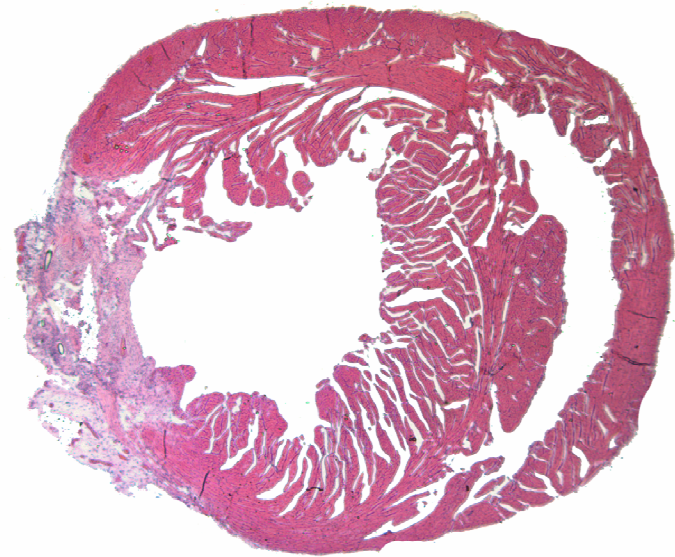

**C** **Fibro**

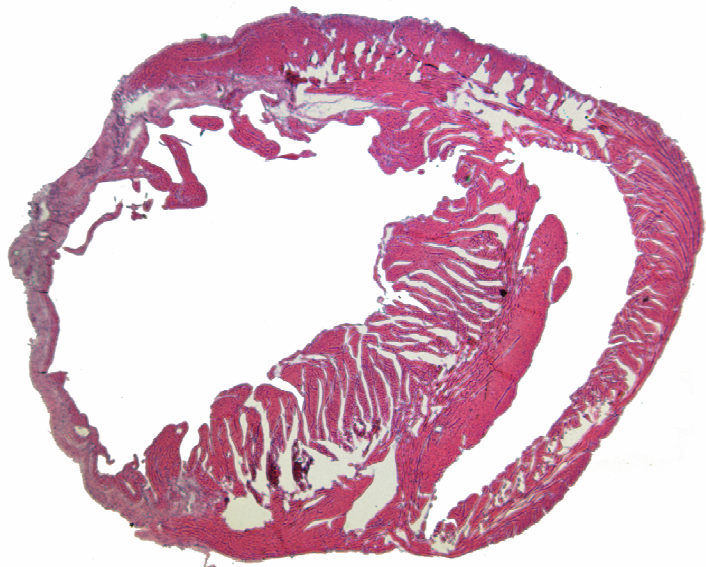

**D** **PBS**

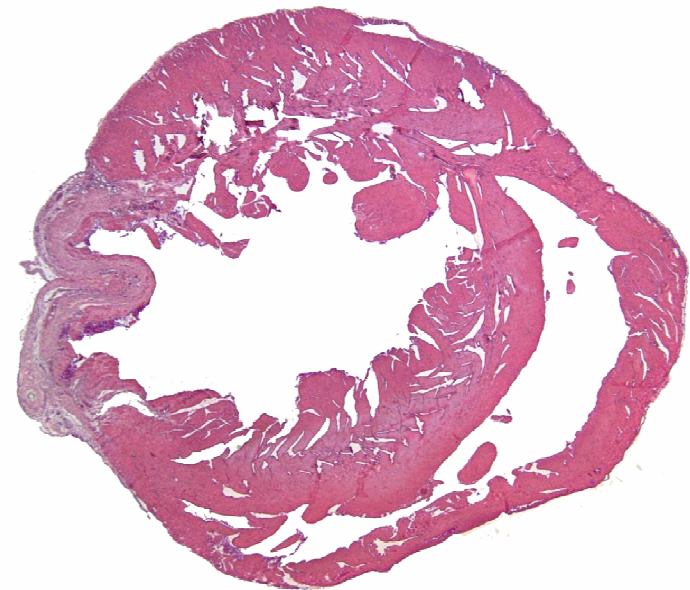

Type of file: figure

Label: 9

Filename: tpa-2008-0663-File011.ppt



**A**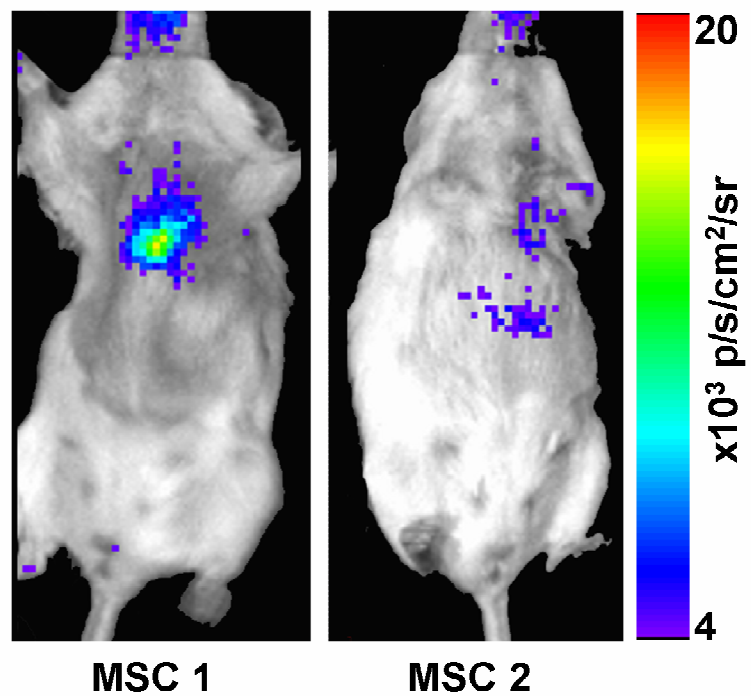**B**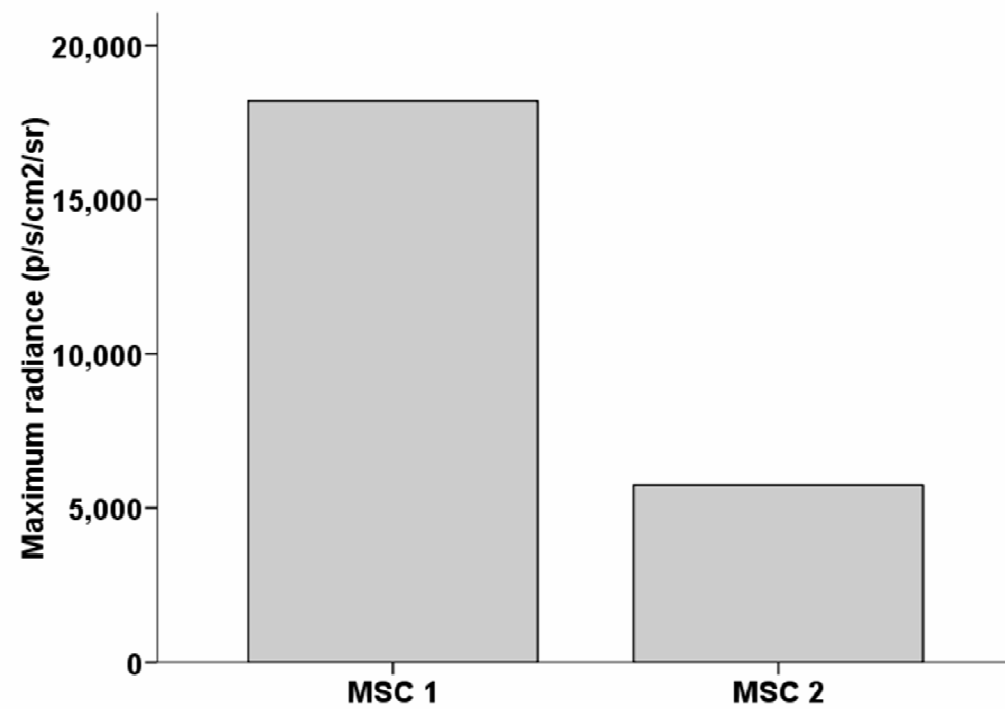**C**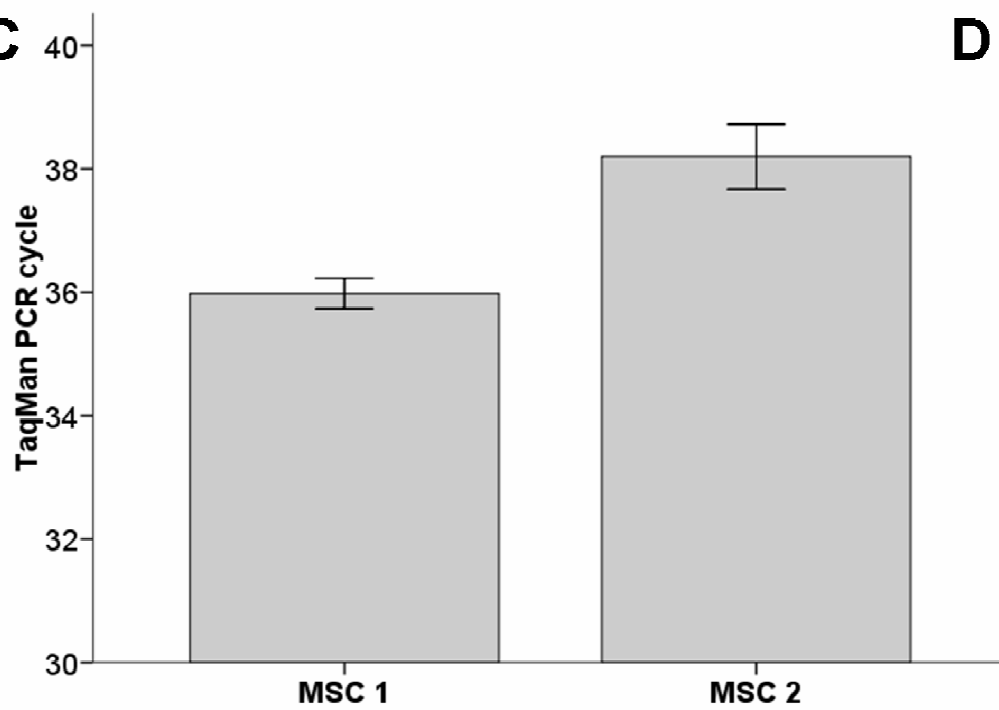**D**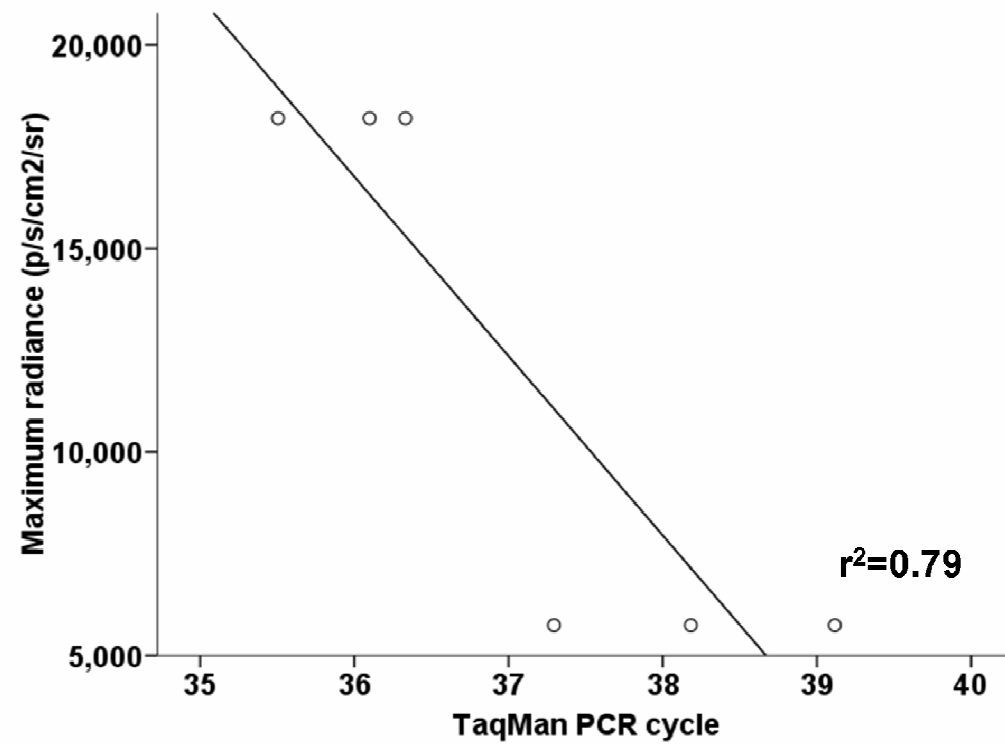

Supplement: NIHMS118061-supplement-1.pdf [file NIHMS118061-supplement-1.pdf]
